# Supplementary material
Source: Research Square preprint supplement (doi:10.21203/rs.3.rs-9441993/v1)
Supplement: Supplementary file 1 [file 1e97360e4c2f1f4b9f6a6ac3.pdf]

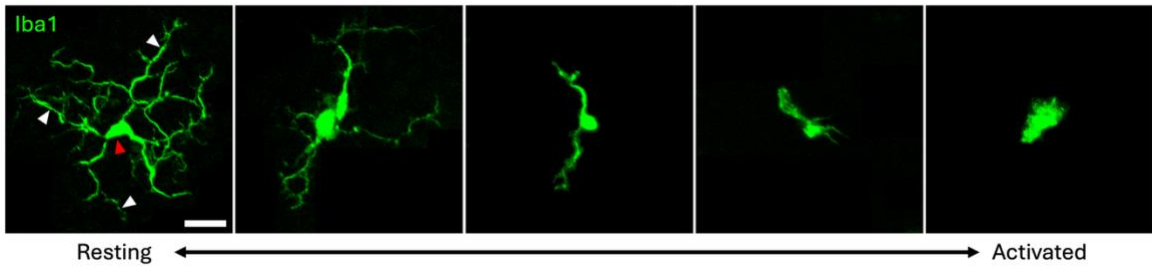

Supplementary Figure 1. Malechka VV et al. 2026

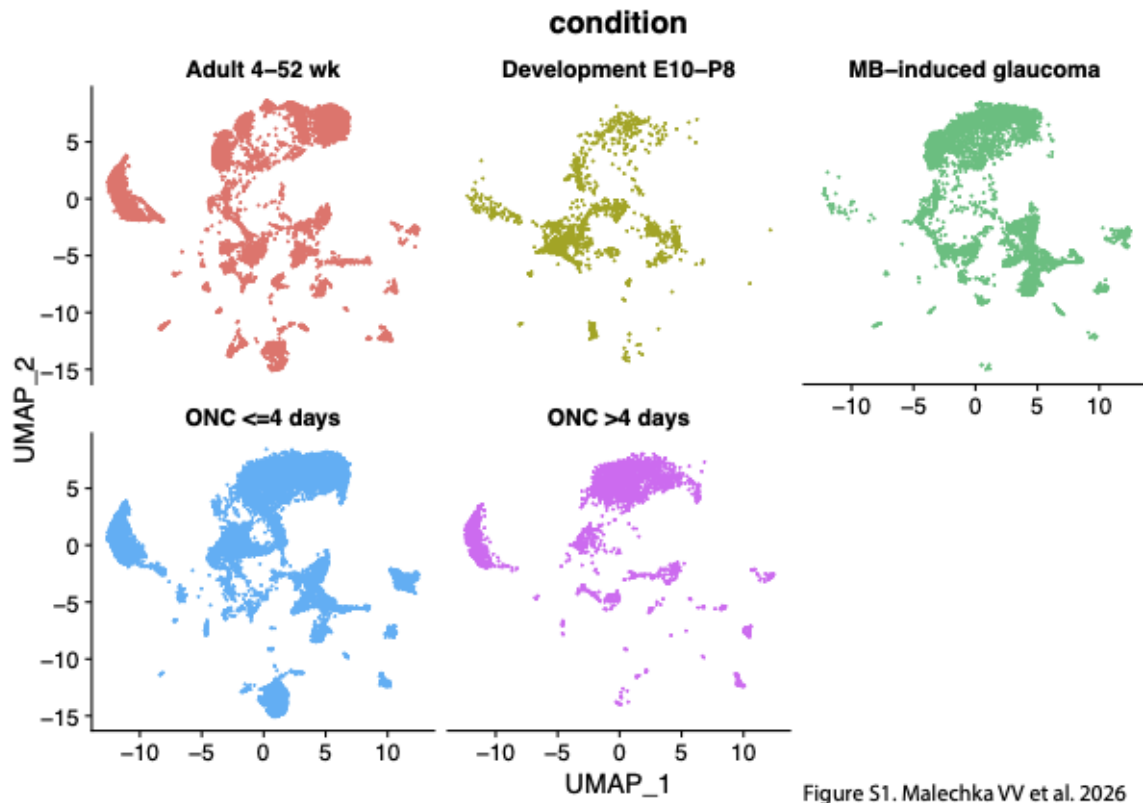

Figure S1. Malechka VV et al. 2026

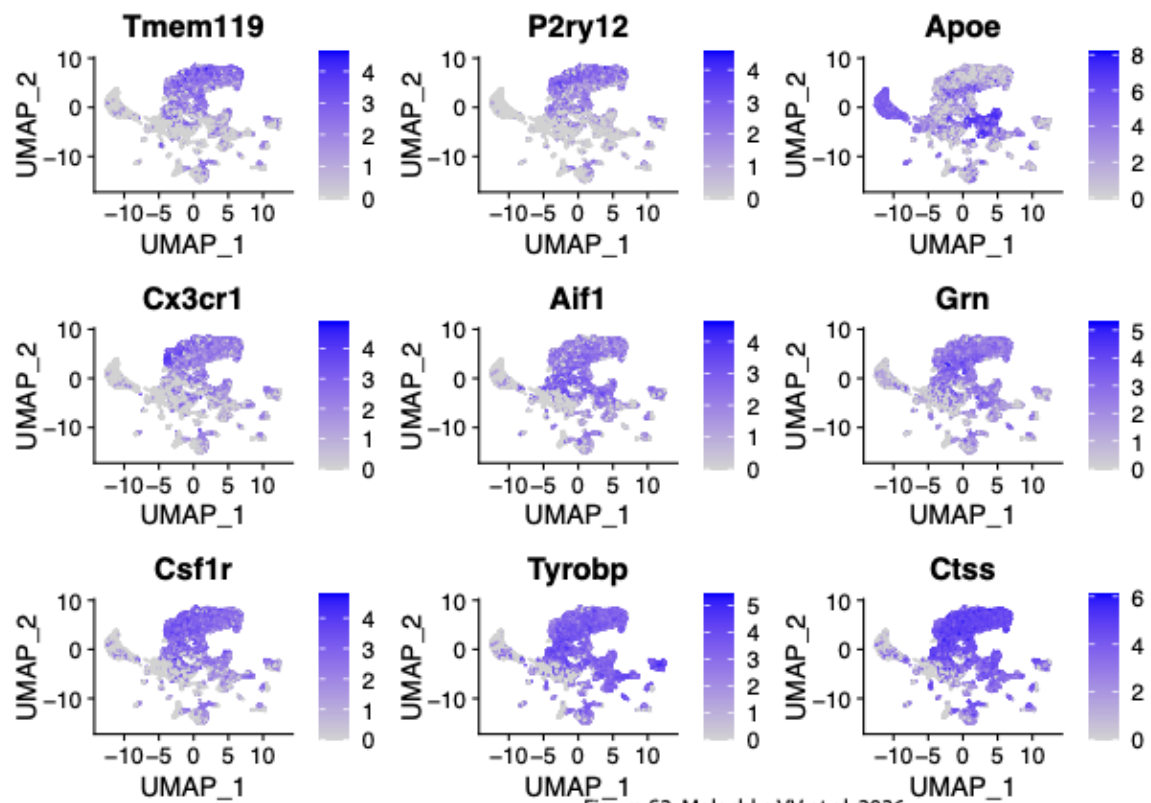

Figure S2. Malechka VV et al. 2026

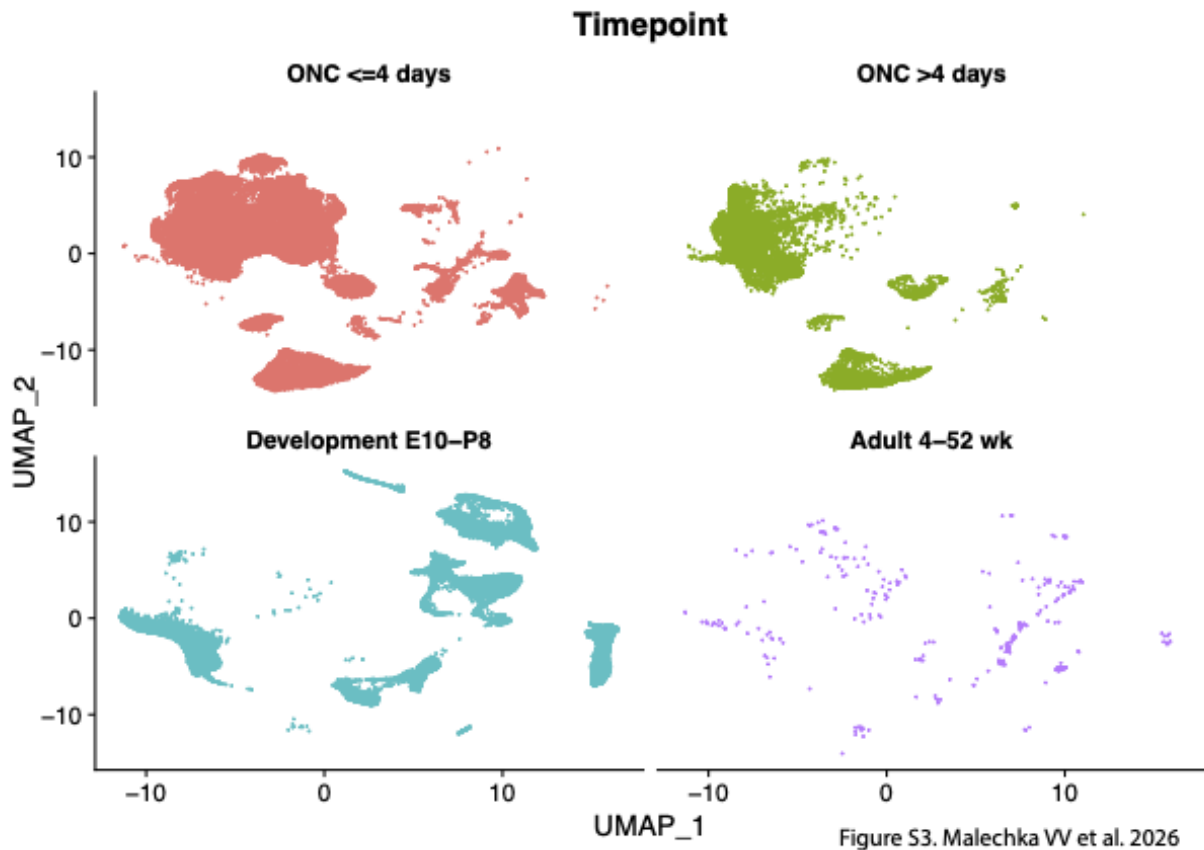

Supplementary Figure 4. Malechka VV et al. 2026

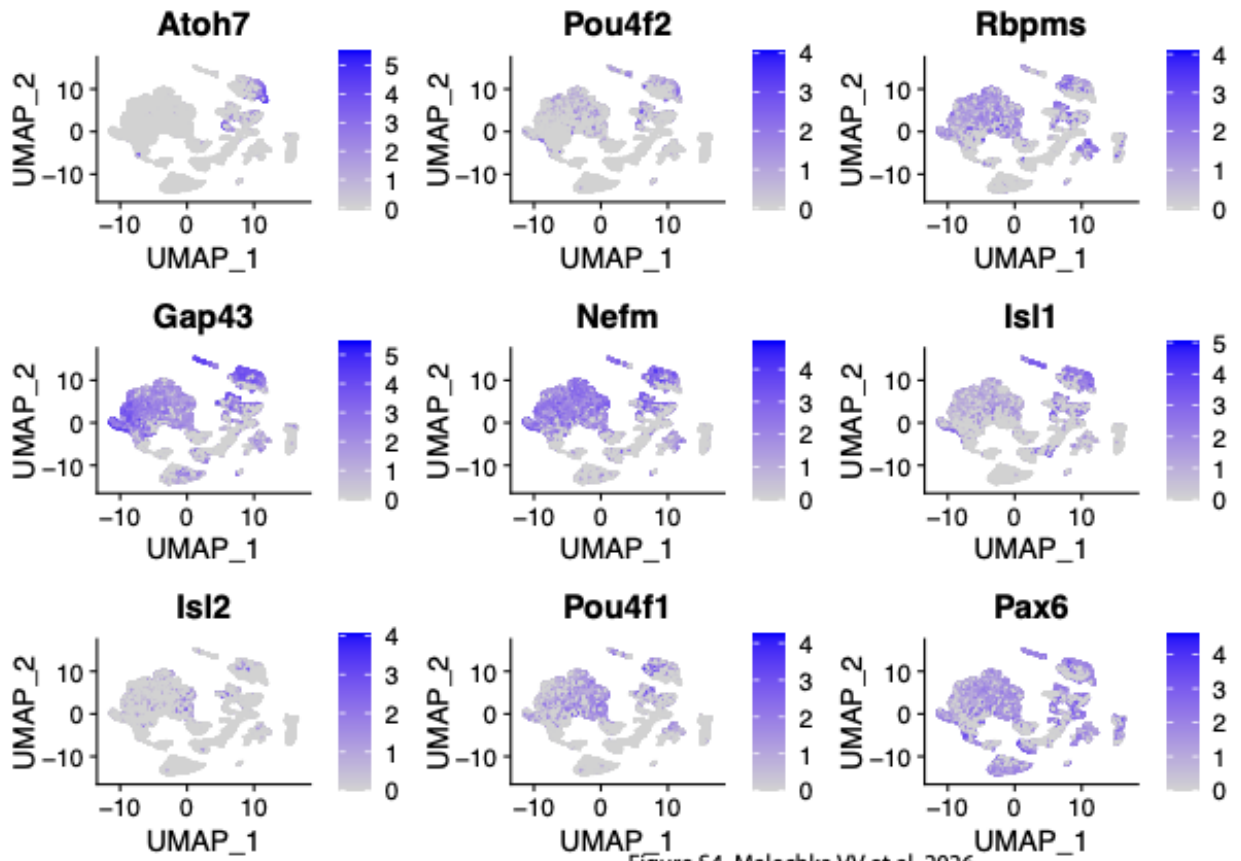

Figure S4. Malechka VV et al. 2026
